# Supplementary material for: Electronic, Optical, Mechanical and Li-Ion Storage Properties of Novel Benzotrithiophene-Based Graphdiyne Monolayers Explored by First Principles and Machine Learning
Source: MDPI journal article supplement (doi:10.3390/batteries8100194), 2022-10-19
Supplement: s1 [file s1]

## Supplementary information

# Electronic, Optical, Mechanical and Li-Ion Storage Properties of the Benzotrithiophene-Based Graphdiyne Monolayers Explored by First-Principles and Machine-Learning

\* Correspondence: bohayra.mortazavi@gmail.com (B.M.); zhuang@iop.uni-hannover.de (X.Z.)

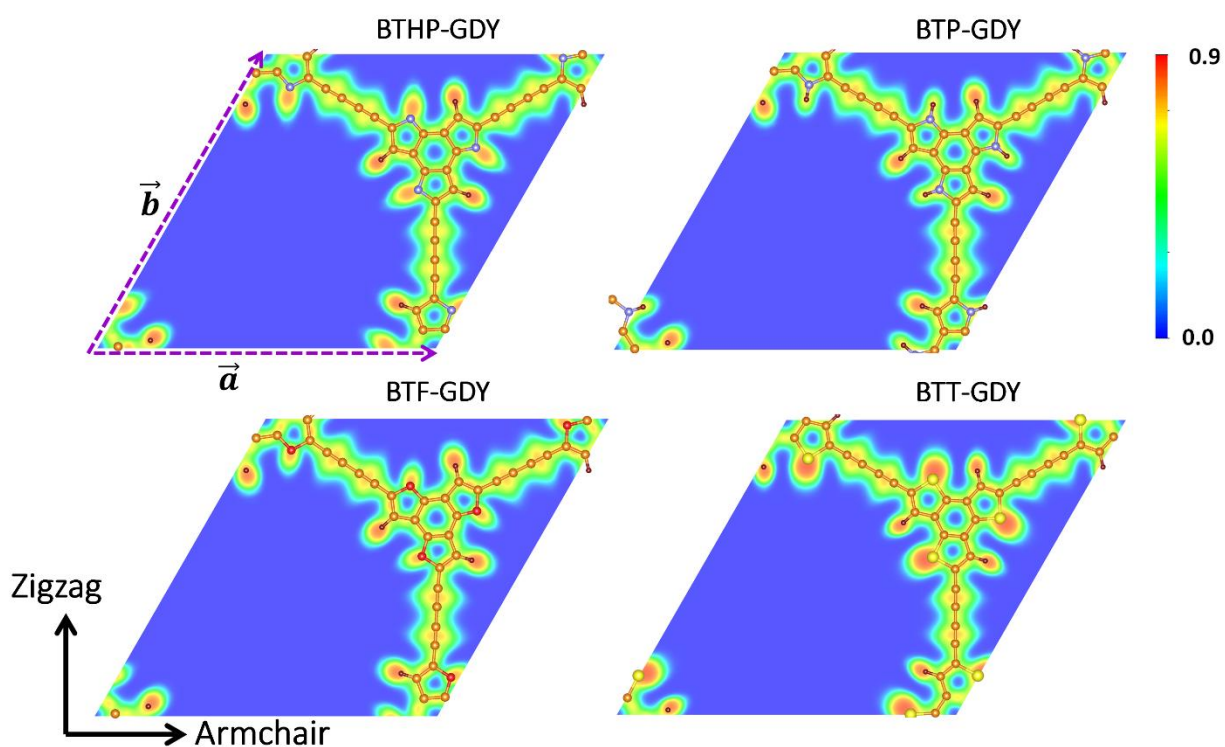

**Figure S1**, Top views of the molecular structure of benzotrithiophene (BTT:  $C_{12}S_3H_6$ ), benzotripyrrol (BTP:  $C_{12}N_3H_9$ ), benzotrifuran (BTF:  $C_{12}O_3H_6$ ), and benzotri(1H-Pyrrol-1-yl) (BTHP:  $C_{12}N_3H_6$ ) and their corresponding graphdiyne (GDY) lattices (BTHP-GDY, BTP-GDY, BTF-GDY, BTT-GDY). Horizontal and vertical directions are so-called zigzag and armchair, respectively. For each one, contour depicts the electron localization function over the polymer surface with a distance of 0.75 Å. Brown, dark brown, blue, red, and yellow circles represent C, H, N, O, and S atoms, respectively.

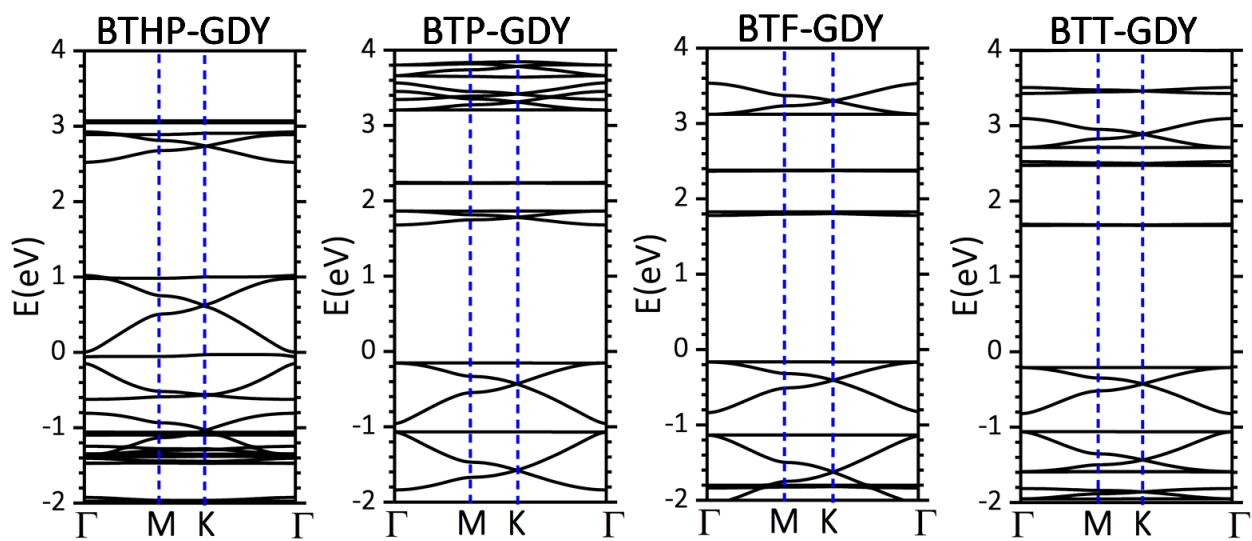

**Figure S2**, Electronic band structures predicted by PBE method for the BTX-GDY monolayers (Fermi level is set to 0 eV).

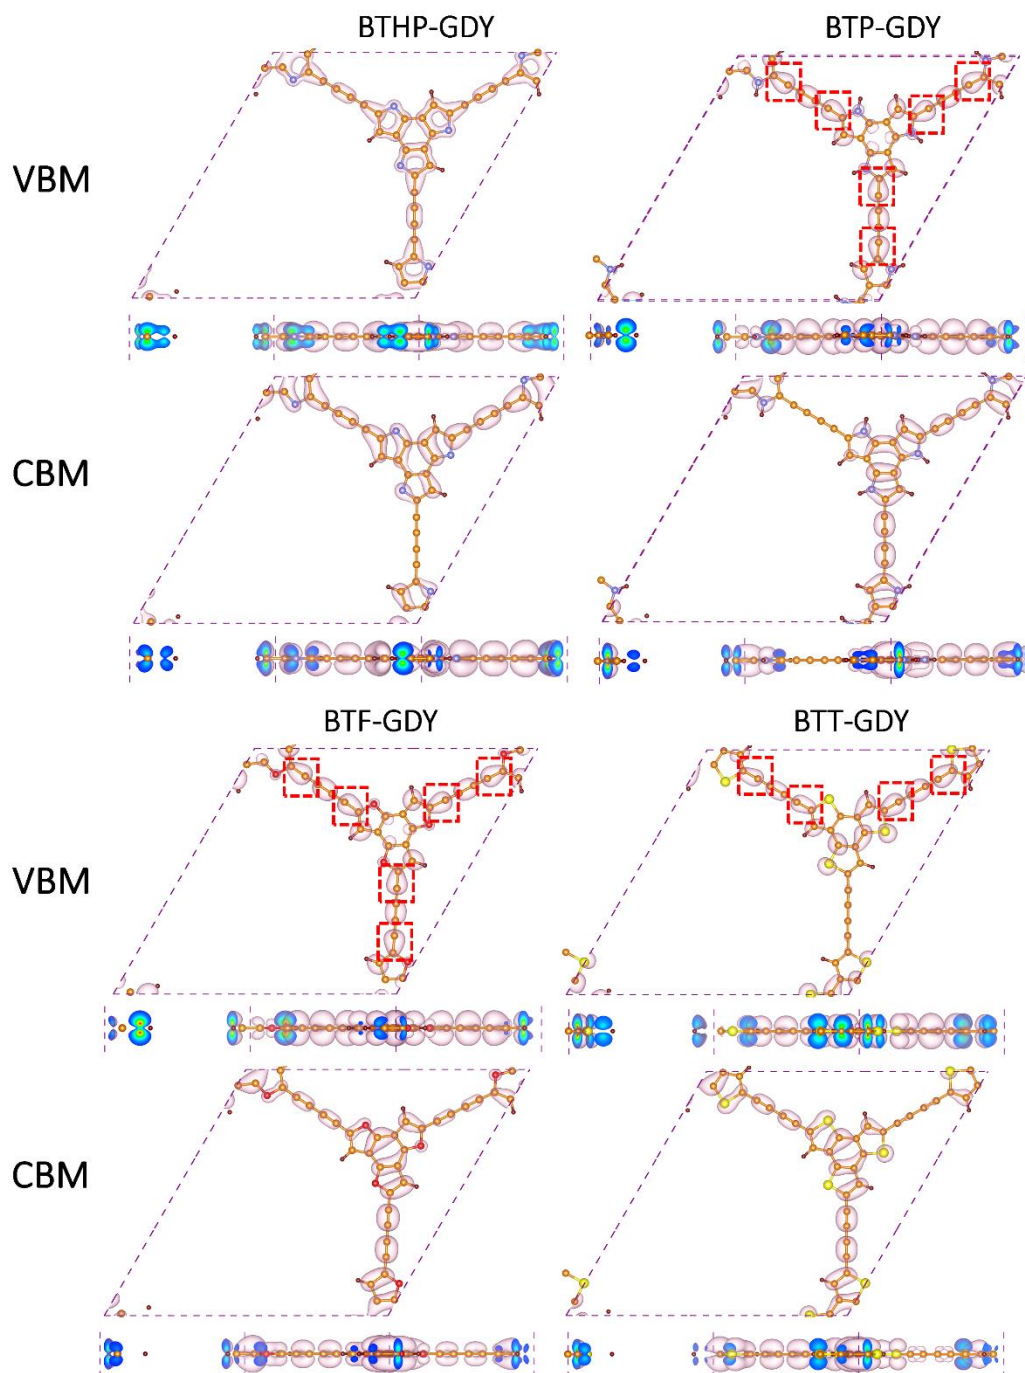

**Figure S3**, Charge density distributions at VBM and CBM of BTX-GDYs. For all cases, the iso-surface is set to  $0.001 \text{ e}/\text{\AA}^3$ . Red dashed rectangles indicate bonding interaction between a p-state of BTX molecule and p\*-state of diacetylene linkers.

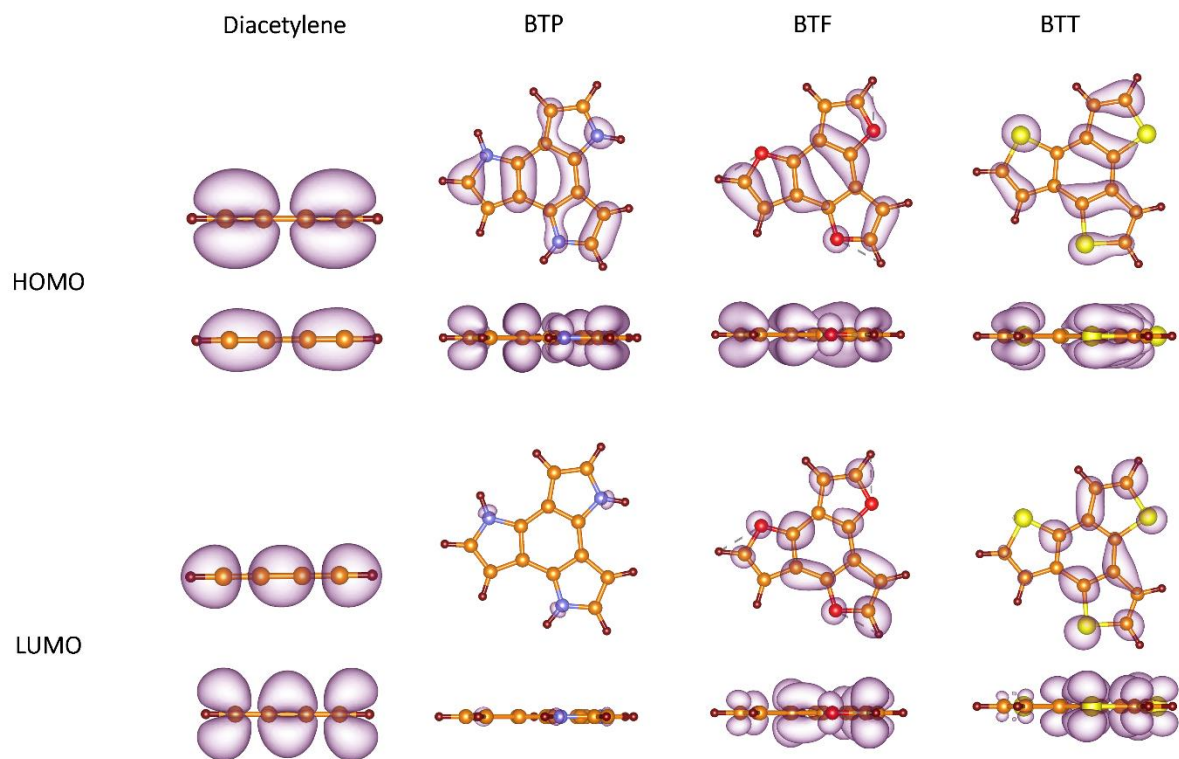

**Figure S4**, Charge density distributions of HOMO and LUMO states of BTX (X= P, F, T) molecules. For all cases, the iso-surface is set to  $0.0025 \text{ e}/\text{\AA}^3$ .

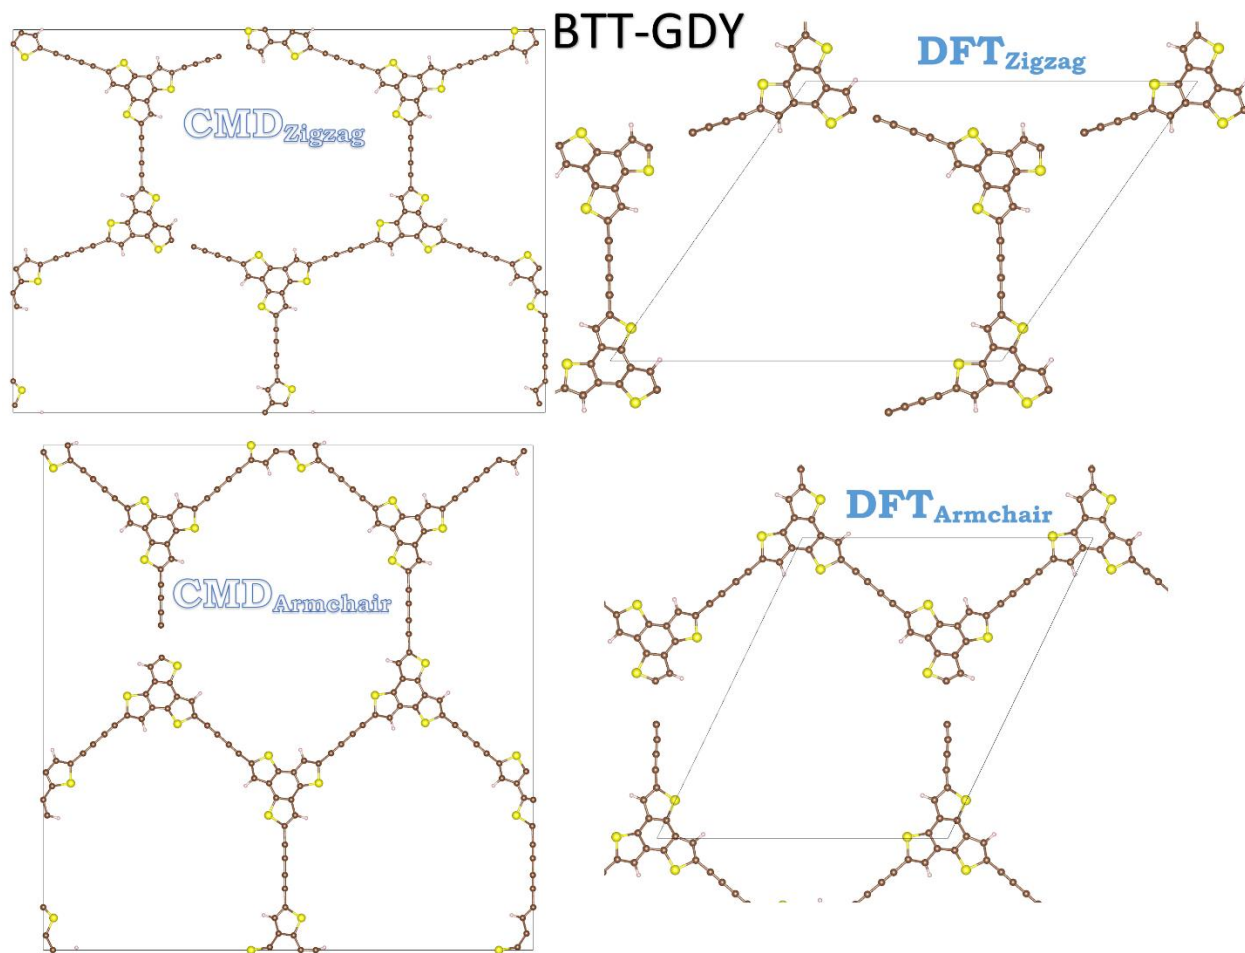

**Figure S5,** Failure mechanism of the BTT-GDY monolayer predicted by the DFT and MLIP-based CMD method for the uniaxial loading along the zigzag and armchair directions.

## Atomic lattices in VASP POSCAR format.

### BTT-GDY

```
1.0000000000000000
23.6704400508862243    0.0000000000000000    0.0000000000000000
11.8299906448121757    20.5456758592951196    0.0000000000000000
0.0000000000000000    0.0000000000000000    15.0000000000000000
  C      S      H
 36      6      6
Direct
0.0603711625072217    0.9959019994315569    0.5000000000000000
0.9356688903120689    0.0059260714179520    0.5000000000000000
0.9395668124328201    0.0638925461151121    0.5000000000000000
0.0023575075955263    0.0576594865605726    0.5000000000000000
0.8888673304007421    0.1300010156613207    0.5000000000000000
0.9118447495715241    0.1735686642145018    0.5000000000000000
0.8766686068753875    0.2412712208425490    0.5000000000000000
0.8472835251342693    0.3012198284774969    0.5000000000000000
0.8147412905657685    0.3665676797763405    0.5000000000000000
0.7854543889088913    0.4265020272907140    0.5000000000000000
0.7501762880813522    0.4942056317646251    0.5000000000000000
0.7729991428077964    0.5378789855377016    0.5000000000000000
0.7221840651705570    0.6039246143306362    0.5000000000000000
0.6594154809913219    0.6100777848982030    0.5000000000000000
0.6013645466593086    0.6718395830992466    0.5000000000000000
0.6076433562038401    0.7283087792615192    0.5000000000000000
0.6695185616671134    0.7245788517494880    0.5000000000000000
0.7260207007377241    0.6619253511772965    0.5000000000000000
0.6850041941656314    0.7752908691794331    0.5000000000000000
0.7515226138445581    0.7525305233520768    0.5000000000000000
0.7840075434920634    0.7878790476743163    0.5000000000000000
0.8141927316763229    0.8177876090151714    0.5000000000000000
0.8468202383035212    0.8506794186443467    0.5000000000000000
0.8773867823954699    0.8802025295862568    0.5000000000000000
0.9100785454629964    0.9153490017597721    0.5000000000000000
0.9766227000963845    0.8925318527039982    0.5000000000000000
0.9921269762394485    0.9432511292186881    0.5000000000000000
0.5351349572382489    0.6872270538967810    0.5000000000000000
0.4914921812288494    0.7536502358693683    0.5000000000000000
0.4236415110328672    0.7863646536824550    0.5000000000000000
0.3635785602593415    0.8174328720473595    0.5000000000000000
0.2980929524792116    0.8506157852874345    0.5000000000000000
0.2380318063352924    0.8814288104863515    0.5000000000000000
0.1701900016502399    0.9141024169264333    0.5000000000000000
0.1265895652948295    0.9805317862864692    0.5000000000000000
0.0540318032802276    0.9394741595322439    0.5000000000000000
0.9975120693292562    0.1326638864838243    0.5000000000000000
0.6644861419785937    0.5349599968825216    0.5000000000000000
0.7961997503717885    0.6669832841540198    0.5000000000000000
0.5325379985207644    0.7983204637401514    0.5000000000000000
0.1291483378430795    0.8694479586472859    0.5000000000000000
0.8654612428449936    0.0009216278544171    0.5000000000000000
0.1426345365057253    0.0163012991371731    0.5000000000000000
0.5190724355101809    0.6514576631902806    0.5000000000000000
0.8248029936723478    0.5220131812632428    0.5000000000000000
0.6491992874831424    0.8270136913388222    0.5000000000000000
0.8370289451507478    0.1460293009209312    0.5000000000000000
0.0124354066906480    0.8408116746315264    0.5000000000000000
```

**BTP-GDY**

1.0000000000000000

|                     |                     |                     |
|---------------------|---------------------|---------------------|
| 23.1014820338700382 | 0.0000000000000000  | 0.0000000000000000  |
| 11.5285206518138388 | 20.0645849672330279 | 0.0000000000000000  |
| 0.0000000000000000  | 0.0000000000000000  | 15.0000000000000000 |

| C  | N | H  |
|----|---|----|
| 36 | 6 | 12 |

Direct

|                    |                    |                    |
|--------------------|--------------------|--------------------|
| 0.0588018306274163 | 0.0033365168301296 | 0.5000000000000000 |
| 0.9383899783668456 | 0.9982907141342561 | 0.5000000000000000 |
| 0.9344146236075218 | 0.0614494131858903 | 0.5000000000000000 |
| 0.9955403682384372 | 0.0623996373263907 | 0.5000000000000000 |
| 0.8816886932294443 | 0.1285982659337223 | 0.5000000000000000 |
| 0.9104872095164840 | 0.1693365253499045 | 0.5000000000000000 |
| 0.8792969162939380 | 0.2386492766676731 | 0.5000000000000000 |
| 0.8483625334840263 | 0.3000685984582204 | 0.5000000000000000 |
| 0.8145517197189371 | 0.3670408938826761 | 0.5000000000000000 |
| 0.7833191544378986 | 0.4284554675806922 | 0.5000000000000000 |
| 0.7521612004423662 | 0.4977452706967298 | 0.5000000000000000 |
| 0.7809419064098785 | 0.5384781802802017 | 0.5000000000000000 |
| 0.7281840376979309 | 0.6056408859008200 | 0.5000000000000000 |
| 0.6670703239708982 | 0.6045954737963377 | 0.5000000000000000 |
| 0.6038056398328483 | 0.6636998977144709 | 0.5000000000000000 |
| 0.6030775915337043 | 0.7255554162708613 | 0.5000000000000000 |
| 0.6623081377559787 | 0.7297100027182860 | 0.5000000000000000 |
| 0.7242528849500053 | 0.6688238527586647 | 0.5000000000000000 |
| 0.6769275930763730 | 0.7824380532522840 | 0.5000000000000000 |
| 0.7463530378409979 | 0.7538882270971128 | 0.5000000000000000 |
| 0.7843050432566318 | 0.7854415776990826 | 0.5000000000000000 |
| 0.8144987174213284 | 0.8168071784617321 | 0.5000000000000000 |
| 0.8477441584000073 | 0.8507361089026461 | 0.5000000000000000 |
| 0.8780363396178393 | 0.8820005482190661 | 0.5000000000000000 |
| 0.9161205362655990 | 0.9133840256862897 | 0.5000000000000000 |
| 0.9855562898384578 | 0.8847935307231155 | 0.5000000000000000 |
| 0.0003526132995893 | 0.9373763219332181 | 0.5000000000000000 |
| 0.5363976553908694 | 0.6783473015060195 | 0.5000000000000000 |
| 0.4958164558721534 | 0.7477178838455952 | 0.5000000000000000 |
| 0.4264079956784269 | 0.7860418923341478 | 0.5000000000000000 |
| 0.3648928290261472 | 0.8174066795785767 | 0.5000000000000000 |
| 0.2978224533733896 | 0.8512985792366652 | 0.5000000000000000 |
| 0.2362898435781649 | 0.8817965076560941 | 0.5000000000000000 |
| 0.1668473925595568 | 0.9196905540006808 | 0.5000000000000000 |
| 0.1261067366890932 | 0.9889780498675744 | 0.5000000000000000 |
| 0.0597381236168147 | 0.9413553258224118 | 0.5000000000000000 |
| 0.9798127748709038 | 0.1278443152927145 | 0.5000000000000000 |
| 0.6829015516931797 | 0.5390999955094371 | 0.5000000000000000 |
| 0.7740049334353258 | 0.6847286772928555 | 0.5000000000000000 |
| 0.5376512731707618 | 0.7752229728178772 | 0.5000000000000000 |
| 0.1253445514834985 | 0.8918385594579431 | 0.5000000000000000 |
| 0.8885635362250031 | 0.9825212695967764 | 0.5000000000000000 |
| 0.1449693276842253 | 0.0235368529827837 | 0.5000000000000000 |
| 0.5176614948169364 | 0.6436798660782551 | 0.5000000000000000 |
| 0.8343668212913452 | 0.5196987785112975 | 0.5000000000000000 |
| 0.6423400418375931 | 0.8356702740044328 | 0.5000000000000000 |
| 0.8283207402195475 | 0.1470851049022170 | 0.5000000000000000 |
| 0.0201040644791111 | 0.8315607437034136 | 0.5000000000000000 |
| 0.0129442595750934 | 0.1443749624481991 | 0.5000000000000000 |
| 0.6501832499237143 | 0.5220531996228472 | 0.5000000000000000 |
| 0.8235857283490445 | 0.6517857976546551 | 0.5000000000000000 |
| 0.5212899712250505 | 0.8247113518681460 | 0.5000000000000000 |
| 0.1424008167777482 | 0.8422004342268751 | 0.5000000000000000 |
| 0.8389674680258943 | 0.0155180697210712 | 0.5000000000000000 |

**BTHP-GDY**

|                     |                     |                     |
|---------------------|---------------------|---------------------|
| 1.0000000000000000  |                     |                     |
| 22.8204192407016286 | 0.0000000000000000  | 0.0000000000000000  |
| 11.3971015676109335 | 19.8324666017033486 | 0.0000000000000000  |
| 0.0000000000000000  | 0.0000000000000000  | 15.0000000000000000 |
| C                   | N                   | H                   |
| 36                  | 6                   | 6                   |

Direct

|                    |                    |                    |
|--------------------|--------------------|--------------------|
| 0.0585011466259704 | 0.0057603989326695 | 0.5000000000000000 |
| 0.9349784764837644 | 0.9983997262857343 | 0.5000000000000000 |
| 0.9314678929546966 | 0.0621573455139045 | 0.5000000000000000 |
| 0.9943771478428270 | 0.0661323677764303 | 0.5000000000000000 |
| 0.8792143399385091 | 0.1283716079639201 | 0.5000000000000000 |
| 0.9115105951450289 | 0.1687300192321232 | 0.5000000000000000 |
| 0.8787325265587619 | 0.2378536917932288 | 0.5000000000000000 |
| 0.8472502706430770 | 0.3006168320827011 | 0.5000000000000000 |
| 0.8141613660747804 | 0.3672061074519159 | 0.5000000000000000 |
| 0.7827533194949221 | 0.4299726480881656 | 0.5000000000000000 |
| 0.7501003088850448 | 0.4991122394820584 | 0.5000000000000000 |
| 0.7824565759989732 | 0.5394274696842732 | 0.5000000000000000 |
| 0.7302466432393858 | 0.6056457793876882 | 0.5000000000000000 |
| 0.6673026164470933 | 0.6017662871596272 | 0.5000000000000000 |
| 0.6031954987892524 | 0.6621780450056082 | 0.5000000000000000 |
| 0.5995586902562570 | 0.7287554618754726 | 0.5000000000000000 |
| 0.6597521881557736 | 0.7323490681305098 | 0.5000000000000000 |
| 0.7268469291690700 | 0.6693385603989567 | 0.5000000000000000 |
| 0.6740423441368812 | 0.7844801183678879 | 0.5000000000000000 |
| 0.7465696680864723 | 0.7522193238509455 | 0.5000000000000000 |
| 0.7831515186827640 | 0.7853512317745428 | 0.5000000000000000 |
| 0.8140185297129635 | 0.8172404473269680 | 0.5000000000000000 |
| 0.8475508127971811 | 0.8507933111918600 | 0.5000000000000000 |
| 0.8786372208781446 | 0.8824557792473869 | 0.5000000000000000 |
| 0.9153389026653144 | 0.9154537004603278 | 0.5000000000000000 |
| 0.9878913427244763 | 0.8832228191337534 | 0.5000000000000000 |
| 0.0020893838826328 | 0.9354231217924235 | 0.5000000000000000 |
| 0.5370525426108577 | 0.6762855386582907 | 0.5000000000000000 |
| 0.4966311485197251 | 0.7492704364585696 | 0.5000000000000000 |
| 0.4270912606992081 | 0.7857534943930390 | 0.5000000000000000 |
| 0.3642930181486421 | 0.8170941648517582 | 0.5000000000000000 |
| 0.2973836313632285 | 0.8508210958320629 | 0.5000000000000000 |
| 0.2345773109164913 | 0.8821816720459047 | 0.5000000000000000 |
| 0.1650654597795454 | 0.9187330765541269 | 0.5000000000000000 |
| 0.1246440600769406 | 0.9916917555888193 | 0.5000000000000000 |
| 0.0621913338766603 | 0.9391630052772241 | 0.5000000000000000 |
| 0.9820947333014388 | 0.1293300313447663 | 0.5000000000000000 |
| 0.6795212465521739 | 0.5385931875956670 | 0.5000000000000000 |
| 0.7777949080318464 | 0.6819875794053718 | 0.5000000000000000 |
| 0.5358241771981059 | 0.7800112442095185 | 0.5000000000000000 |
| 0.1259210557648389 | 0.8879450903703031 | 0.5000000000000000 |
| 0.8840713951809077 | 0.9856943201484250 | 0.5000000000000000 |
| 0.1435607930392252 | 0.0268327784078283 | 0.5000000000000000 |
| 0.5181173755944207 | 0.6411596680195346 | 0.5000000000000000 |
| 0.8364743573499496 | 0.5208864541900740 | 0.5000000000000000 |
| 0.6387680995229866 | 0.8383393698001449 | 0.5000000000000000 |
| 0.8251963438700958 | 0.1469462843340235 | 0.5000000000000000 |
| 0.0232407093326635 | 0.8293701481234801 | 0.5000000000000000 |



**BTF-GDY**

|                     |                     |                     |
|---------------------|---------------------|---------------------|
| 1.0000000000000000  |                     |                     |
| 22.8846052269716829 | 0.0000000000000000  | 0.0000000000000000  |
| 11.4334120193448552 | 19.8534414200344891 | 0.0000000000000000  |
| 0.0000000000000000  | 0.0000000000000000  | 15.0000000000000000 |

  

|    |   |   |
|----|---|---|
| C  | O | H |
| 36 | 6 | 6 |

Direct

|                    |                    |                    |
|--------------------|--------------------|--------------------|
| 0.0561240335203408 | 0.0081659938757284 | 0.5000000000000000 |
| 0.9407046769102649 | 0.9938662795550073 | 0.5000000000000000 |
| 0.9315815278241644 | 0.0594053007462065 | 0.5000000000000000 |
| 0.9905749839598457 | 0.0645200618224990 | 0.5000000000000000 |
| 0.8764006604552534 | 0.1268200880804642 | 0.5000000000000000 |
| 0.9038679738549504 | 0.1685262736587774 | 0.5000000000000000 |
| 0.8742872005827209 | 0.2382138504269733 | 0.5000000000000000 |
| 0.8461346734845421 | 0.3001459964944360 | 0.5000000000000000 |
| 0.8153937960500457 | 0.3676642717186809 | 0.5000000000000000 |
| 0.7872562565094441 | 0.4295815747331844 | 0.5000000000000000 |
| 0.7576916625188659 | 0.4993108169512439 | 0.5000000000000000 |
| 0.7851796080293383 | 0.5409761994168036 | 0.5000000000000000 |
| 0.7300169272463322 | 0.6083726276981025 | 0.5000000000000000 |
| 0.6709894424066931 | 0.6033431470584460 | 0.5000000000000000 |
| 0.6054703617091093 | 0.6597288516313782 | 0.5000000000000000 |
| 0.6005756026223494 | 0.7236581275846561 | 0.5000000000000000 |
| 0.6570804356749989 | 0.7327689303441858 | 0.5000000000000000 |
| 0.7210487407146573 | 0.6738528255290035 | 0.5000000000000000 |
| 0.6695157192350507 | 0.7878648235379728 | 0.5000000000000000 |
| 0.7386995114538735 | 0.7603596399705452 | 0.5000000000000000 |
| 0.7789427315674970 | 0.7899448760742658 | 0.5000000000000000 |
| 0.8126479786559599 | 0.8182618233446135 | 0.5000000000000000 |
| 0.8494004451787944 | 0.8491683260188196 | 0.5000000000000000 |
| 0.8831126647556076 | 0.8774822519107985 | 0.5000000000000000 |
| 0.9232732977741307 | 0.9071669444202826 | 0.5000000000000000 |
| 0.9924235001672415 | 0.8798022321409107 | 0.5000000000000000 |
| 0.0047179220414364 | 0.9349796248187658 | 0.5000000000000000 |
| 0.5379539360740111 | 0.6720569760616755 | 0.5000000000000000 |
| 0.4963695091885114 | 0.7411377120118345 | 0.5000000000000000 |
| 0.4266102342773550 | 0.7815309900053293 | 0.5000000000000000 |
| 0.3646661629596011 | 0.8158304275472474 | 0.5000000000000000 |
| 0.2970751197583184 | 0.8530142233341351 | 0.5000000000000000 |
| 0.2350899615811670 | 0.8868807238274456 | 0.5000000000000000 |
| 0.1652967141178507 | 0.9269621371796148 | 0.5000000000000000 |
| 0.1235720865028185 | 0.9960287205481109 | 0.5000000000000000 |
| 0.0611817264271650 | 0.9441743914327887 | 0.5000000000000000 |
| 0.9745586741102201 | 0.1303528688640014 | 0.5000000000000000 |
| 0.6869907844403116 | 0.5374917433720228 | 0.5000000000000000 |
| 0.7710151247233057 | 0.6897723103442246 | 0.5000000000000000 |
| 0.5347286199506698 | 0.7734827562152518 | 0.5000000000000000 |
| 0.1270820755183593 | 0.8944556777350243 | 0.5000000000000000 |
| 0.8908259874183599 | 0.9777829982534385 | 0.5000000000000000 |
| 0.1402825150020917 | 0.0327461098538393 | 0.5000000000000000 |
| 0.5211644704123870 | 0.6353940826367506 | 0.5000000000000000 |
| 0.8386252561102765 | 0.5242722086479077 | 0.5000000000000000 |
| 0.6328987739664100 | 0.8412518383309759 | 0.5000000000000000 |
| 0.8229727727927809 | 0.1434926903154761 | 0.5000000000000000 |
| 0.0291383767644788 | 0.8264405589201615 | 0.5000000000000000 |
